# Supplementary material for: Welfare states, the Great Recession and health: Trends in educational inequalities in self-reported health in 26 European countries
Source: PubMed Central journal article supplement (PMC5825059; doi:10.1371/journal.pone.0193165), 2018-02-23
Supplement: pone.0193165.s001.pdf [file pone.0193165.s001.pdf]

S1 Table: Evolution of health inequalities between 2005 and 2014. Absolute (SII) and relative inequalities (RII) on poor SRH, globally, by social welfare regime and country (adjusted for sex and age).

|                       | 2005         | 2006         | 2007         | 2008         | 2009         | 2010         | 2011         | 2012         | 2013         | 2014         |
|-----------------------|--------------|--------------|--------------|--------------|--------------|--------------|--------------|--------------|--------------|--------------|
| <b>SII</b>            |              |              |              |              |              |              |              |              |              |              |
| <b>Scandinavian</b>   | <b>0.058</b> | <b>0.062</b> | <b>0.058</b> | <b>0.053</b> | <b>0.053</b> | <b>0.054</b> | <b>0.061</b> | <b>0.053</b> | <b>0.057</b> | <b>0.064</b> |
| <i>DK</i>             | 0.032        | 0.034        | 0.033        | 0.046        | 0.032        | 0.054        | 0.061        | 0.044        | 0.044        | 0.047        |
| <i>FI</i>             | 0.062        | 0.048        | 0.050        | 0.052        | 0.046        | 0.035        | 0.044        | 0.044        | 0.045        | 0.043        |
| <i>IS</i>             | 0.051        | 0.054        | 0.072        | 0.039        | 0.039        | 0.060        | 0.084        | 0.061        | 0.084        | 0.081        |
| <i>NO</i>             | 0.068        | 0.100        | 0.072        | 0.060        | 0.084        | 0.061        | 0.080        | 0.069        | 0.050        | 0.099        |
| <i>SE</i>             | 0.062        | 0.067        | 0.056        | 0.050        | 0.056        | 0.063        | 0.054        | 0.034        | 0.061        | 0.055        |
| <b>Southern</b>       | <b>0.082</b> | <b>0.077</b> | <b>0.082</b> | <b>0.076</b> | <b>0.075</b> | <b>0.069</b> | <b>0.078</b> | <b>0.073</b> | <b>0.081</b> | <b>0.085</b> |
| <i>CY</i>             | 0.116        | 0.105        | 0.109        | 0.085        | 0.098        | 0.088        | 0.080        | 0.065        | 0.078        | 0.061        |
| <i>ES</i>             | 0.086        | 0.075        | 0.077        | 0.056        | 0.057        | 0.057        | 0.049        | 0.053        | 0.054        | 0.065        |
| <i>IT</i>             | 0.068        | 0.068        | 0.075        | 0.076        | 0.070        | 0.054        | 0.081        | 0.069        | 0.082        | 0.082        |
| <i>PT</i>             | 0.118        | 0.115        | 0.120        | 0.150        | 0.146        | 0.146        | 0.147        | 0.136        | 0.141        | 0.151        |
| <b>Bismarckian</b>    | <b>0.073</b> | <b>0.074</b> | <b>0.073</b> | <b>0.078</b> | <b>0.083</b> | <b>0.082</b> | <b>0.088</b> | <b>0.083</b> | <b>0.082</b> | <b>0.094</b> |
| <i>AT</i>             | 0.082        | 0.071        | 0.072        | 0.086        | 0.085        | 0.089        | 0.09         | 0.092        | 0.084        | 0.105        |
| <i>BE</i>             | 0.073        | 0.081        | 0.075        | 0.073        | 0.09         | 0.104        | 0.098        | 0.087        | 0.088        | 0.114        |
| <i>DE</i>             | 0.067        | 0.084        | 0.070        | 0.093        | 0.10         | 0.098        | 0.116        | 0.096        | 0.104        | 0.119        |
| <i>FR</i>             | 0.090        | 0.080        | 0.079        | 0.080        | 0.084        | 0.072        | 0.082        | 0.081        | 0.072        | 0.083        |
| <i>LU</i>             | 0.087        | 0.082        | 0.088        | 0.096        | 0.087        | 0.088        | 0.100        | 0.097        | 0.122        | 0.108        |
| <i>NL</i>             | 0.030        | 0.034        | 0.035        | 0.039        | 0.033        | 0.037        | 0.043        | 0.042        | 0.037        | 0.044        |
| <b>Anglo-Saxon</b>    | <b>0.059</b> | <b>0.062</b> | <b>0.052</b> | <b>0.046</b> | <b>0.059</b> | <b>0.053</b> | <b>0.063</b> | <b>0.101</b> | <b>0.086</b> | <b>0.075</b> |
| <i>IE</i>             | 0.030        | 0.037        | 0.024        | 0.024        | 0.036        | 0.022        | 0.031        | 0.036        | 0.039        | 0.040        |
| <i>UK</i>             | 0.078        | 0.078        | 0.070        | 0.058        | 0.075        | 0.075        | 0.082        | 0.135        | 0.120        | 0.100        |
| <b>Post-communist</b> | <b>0.176</b> | <b>0.170</b> | <b>0.174</b> | <b>0.168</b> | <b>0.163</b> | <b>0.158</b> | <b>0.161</b> | <b>0.160</b> | <b>0.159</b> | <b>0.165</b> |
| <i>CZ</i>             | 0.161        | 0.159        | 0.168        | 0.155        | 0.160        | 0.159        | 0.164        | 0.174        | 0.145        | 0.159        |
| <i>HU</i>             | 0.218        | 0.210        | 0.221        | 0.200        | 0.181        | 0.174        | 0.181        | 0.184        | 0.190        | 0.205        |
| <i>PL</i>             | 0.164        | 0.151        | 0.151        | 0.153        | 0.159        | 0.147        | 0.134        | 0.133        | 0.135        | 0.138        |
| <i>SI</i>             | 0.200        | 0.183        | 0.192        | 0.196        | 0.175        | 0.162        | 0.171        | 0.161        | 0.163        | 0.166        |
| <i>SK</i>             | 0.149        | 0.160        | 0.170        | 0.148        | 0.133        | 0.150        | 0.166        | 0.151        | 0.147        | 0.159        |
| <b>Former-USSR</b>    | <b>0.151</b> | <b>0.153</b> | <b>0.154</b> | <b>0.164</b> | <b>0.156</b> | <b>0.150</b> | <b>0.167</b> | <b>0.141</b> | <b>0.158</b> | <b>0.146</b> |
| <i>EE</i>             | 0.123        | 0.142        | 0.143        | 0.131        | 0.139        | 0.134        | 0.147        | 0.121        | 0.145        | 0.120        |
| <i>LT</i>             | 0.151        | 0.158        | 0.154        | 0.178        | 0.173        | 0.153        | 0.203        | 0.186        | 0.191        | 0.184        |
| <i>LV</i>             | 0.182        | 0.163        | 0.171        | 0.180        | 0.151        | 0.154        | 0.148        | 0.121        | 0.144        | 0.142        |

S1 Table: (continuation)

|                       | 2005         | 2006         | 2007         | 2008         | 2009         | 2010         | 2011         | 2012         | 2013         | 2014         |
|-----------------------|--------------|--------------|--------------|--------------|--------------|--------------|--------------|--------------|--------------|--------------|
| <b>RII</b>            |              |              |              |              |              |              |              |              |              |              |
| <b>Scandinavian</b>   | <b>2.320</b> | <b>2.525</b> | <b>2.762</b> | <b>2.540</b> | <b>2.611</b> | <b>2.634</b> | <b>2.706</b> | <b>2.614</b> | <b>2.628</b> | <b>2.832</b> |
| <i>DK</i>             | 1.770        | 1.738        | 1.692        | 2.100        | 1.753        | 2.475        | 2.343        | 1.877        | 1.929        | 1.957        |
| <i>FI</i>             | 2.179        | 1.873        | 2.445        | 2.567        | 2.372        | 1.885        | 2.119        | 2.196        | 2.436        | 2.493        |
| <i>IS</i>             | 2.536        | 4.796        | 9.909        | 3.278        | 2.353        | 3.932        | 3.544        | 3.980        | 4.456        | 3.613        |
| <i>NO</i>             | 2.402        | 3.591        | 3.000        | 2.382        | 3.548        | 2.498        | 3.012        | 3.376        | 2.005        | 3.437        |
| <i>SE</i>             | 2.658        | 3.222        | 3.306        | 2.595        | 2.942        | 4.147        | 3.419        | 2.537        | 3.705        | 3.035        |
| <b>Southern</b>       | <b>2.900</b> | <b>2.700</b> | <b>2.851</b> | <b>3.174</b> | <b>2.982</b> | <b>2.928</b> | <b>3.016</b> | <b>2.857</b> | <b>3.020</b> | <b>2.946</b> |
| <i>CY</i>             | 4.917        | 4.056        | 3.842        | 3.752        | 3.741        | 4.038        | 3.465        | 3.387        | 3.702        | 3.377        |
| <i>ES</i>             | 2.648        | 2.416        | 2.573        | 2.919        | 2.777        | 2.899        | 2.723        | 2.753        | 2.570        | 2.889        |
| <i>IT</i>             | 2.830        | 2.789        | 2.956        | 3.084        | 2.821        | 2.421        | 2.799        | 2.536        | 3.043        | 2.976        |
| <i>PT</i>             | 2.782        | 2.729        | 2.948        | 4.633        | 4.055        | 3.664        | 4.577        | 3.756        | 3.885        | 3.097        |
| <b>Bismarckian</b>    | <b>2.498</b> | <b>2.659</b> | <b>2.643</b> | <b>2.957</b> | <b>3.097</b> | <b>2.969</b> | <b>3.064</b> | <b>3.022</b> | <b>2.911</b> | <b>3.357</b> |
| <i>AT</i>             | 3.473        | 3.334        | 2.847        | 3.035        | 2.925        | 3.298        | 2.950        | 3.603        | 2.856        | 3.760        |
| <i>BE</i>             | 2.821        | 3.288        | 3.111        | 3.007        | 3.194        | 3.684        | 3.261        | 2.987        | 3.196        | 3.801        |
| <i>DE</i>             | 1.931        | 2.267        | 2.035        | 2.809        | 3.156        | 2.905        | 3.154        | 2.779        | 3.024        | 3.484        |
| <i>FR</i>             | 3.318        | 3.034        | 3.323        | 3.401        | 3.188        | 2.790        | 3.163        | 3.029        | 2.783        | 3.229        |
| <i>LU</i>             | 4.523        | 5.566        | 5.619        | 5.573        | 3.899        | 4.251        | 5.086        | 5.272        | 5.368        | 4.422        |
| <i>NL</i>             | 2.054        | 2.381        | 2.214        | 2.412        | 2.425        | 2.367        | 2.590        | 2.620        | 2.306        | 2.793        |
| <b>Anglo-Saxon</b>    | <b>2.882</b> | <b>3.565</b> | <b>2.917</b> | <b>2.680</b> | <b>3.503</b> | <b>2.925</b> | <b>3.438</b> | <b>4.205</b> | <b>3.707</b> | <b>3.141</b> |
| <i>IE</i>             | 2.264        | 3.143        | 2.363        | 2.266        | 3.307        | 2.069        | 2.535        | 3.043        | 2.694        | 2.997        |
| <i>UK</i>             | 3.101        | 3.727        | 3.072        | 2.795        | 3.561        | 3.315        | 3.817        | 4.486        | 4.169        | 3.197        |
| <b>Post-communist</b> | <b>2.824</b> | <b>2.846</b> | <b>3.028</b> | <b>3.090</b> | <b>3.147</b> | <b>3.132</b> | <b>3.341</b> | <b>3.450</b> | <b>3.443</b> | <b>3.840</b> |
| <i>CZ</i>             | 3.353        | 3.762        | 4.847        | 3.928        | 4.404        | 4.176        | 4.418        | 5.743        | 4.051        | 4.888        |
| <i>HU</i>             | 3.179        | 2.941        | 2.908        | 3.053        | 2.972        | 2.992        | 3.296        | 3.288        | 3.510        | 4.190        |
| <i>PL</i>             | 2.569        | 2.579        | 2.721        | 2.667        | 2.861        | 2.789        | 2.751        | 2.698        | 2.659        | 2.951        |
| <i>SI</i>             | 4.258        | 3.977        | 4.167        | 4.623        | 4.028        | 3.581        | 3.752        | 4.485        | 5.262        | 5.403        |
| <i>SK</i>             | 2.382        | 2.298        | 2.508        | 2.575        | 2.579        | 3.111        | 3.664        | 3.784        | 3.716        | 3.769        |
| <b>Former-USSR</b>    | <b>2.296</b> | <b>2.340</b> | <b>2.399</b> | <b>2.572</b> | <b>2.556</b> | <b>2.417</b> | <b>2.562</b> | <b>2.266</b> | <b>2.618</b> | <b>2.400</b> |
| <i>EE</i>             | 2.083        | 2.551        | 2.505        | 2.424        | 2.719        | 2.417        | 2.309        | 1.969        | 2.541        | 2.169        |
| <i>LT</i>             | 2.494        | 2.375        | 2.446        | 2.655        | 2.604        | 2.434        | 3.135        | 2.687        | 2.801        | 2.841        |
| <i>LV</i>             | 2.298        | 2.121        | 2.320        | 2.606        | 2.386        | 2.366        | 2.330        | 2.185        | 2.537        | 2.307        |
